# Supplementary material for: Notch3 expression in capillary pericytes predicts worse graft outcome in human renal grafts with antibody‐mediated rejection
Source: PubMed Central journal article supplement (PMC9170800; doi:10.1111/jcmm.17325), 2022-05-25
Supplement: JCMM-26-3203-s001.pdf [file JCMM-26-3203-s001.pdf]

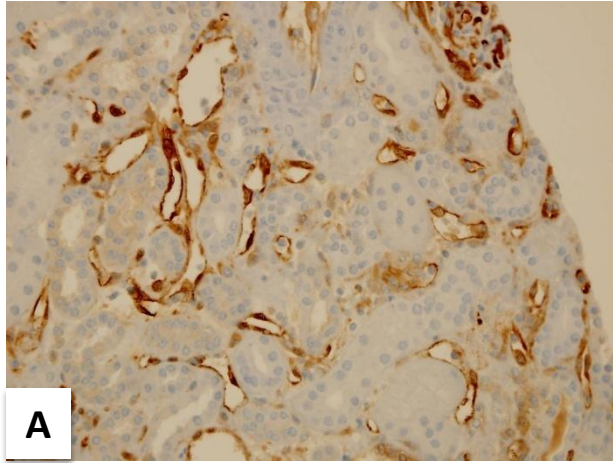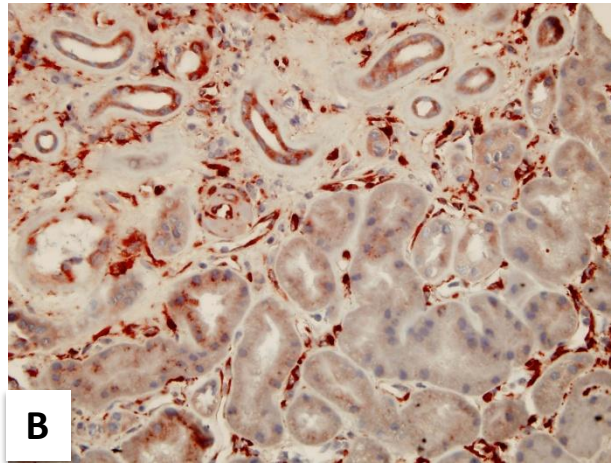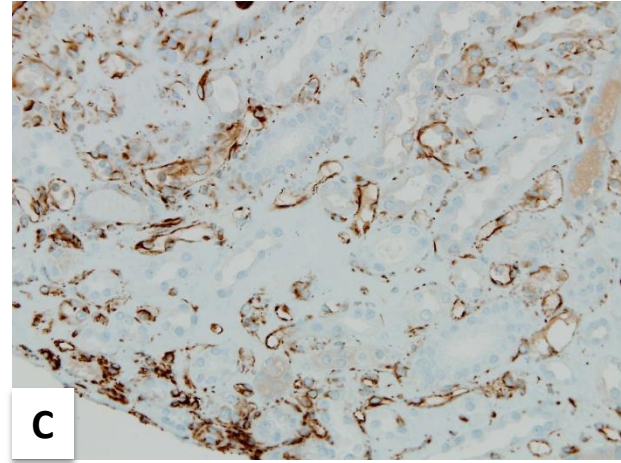

**Supplementary Figure 1**
